# Supplementary figures and images for: Biopsy Results Are Not Sufficient to Exclude Breast Implant–associated Anaplastic Large Cell Lymphoma: A Case Mistaken for Disseminated Silicosis
Source: PubMed Central journal article supplement — Plast Reconstr Surg Glob Open. 2020 Sep 28;8(9):e3153. doi: 10.1097/GOX.0000000000003153 (PMC7544370; doi:10.1097/gox.0000000000003153), 2020-09-28

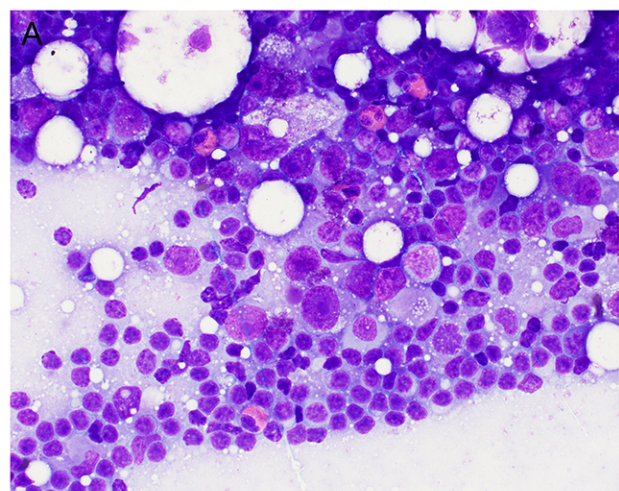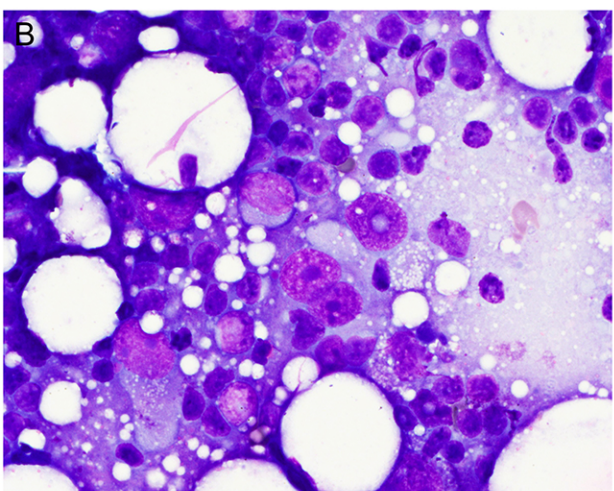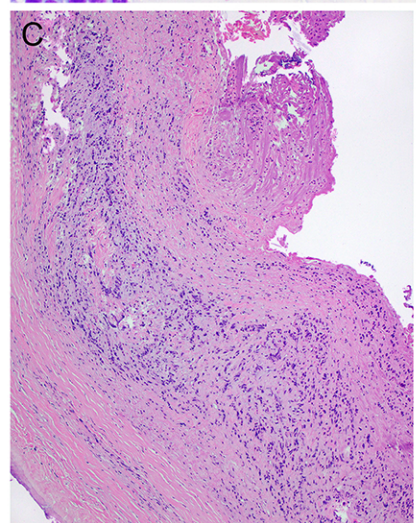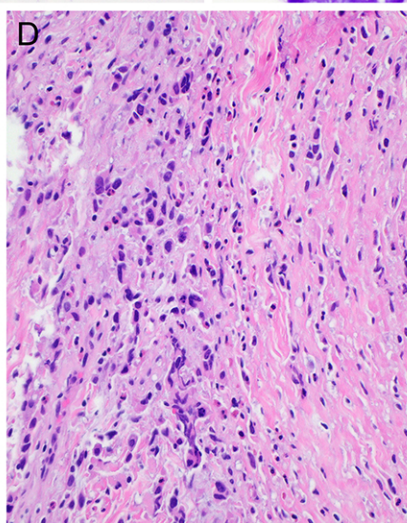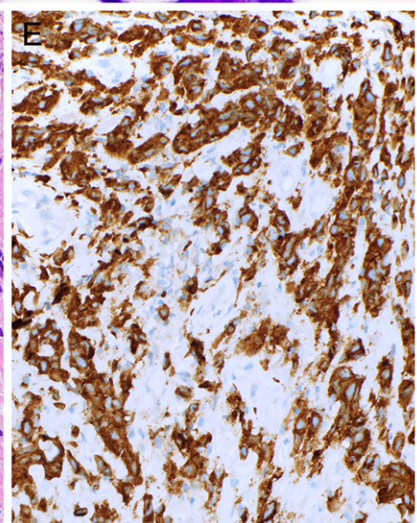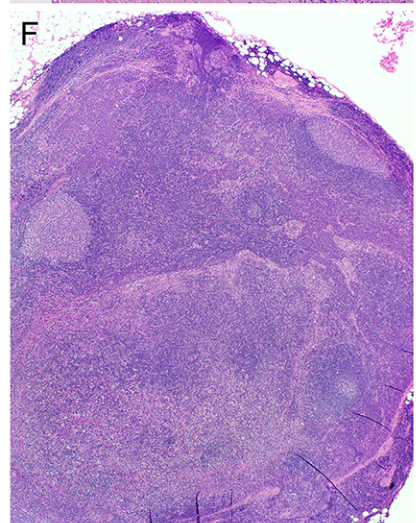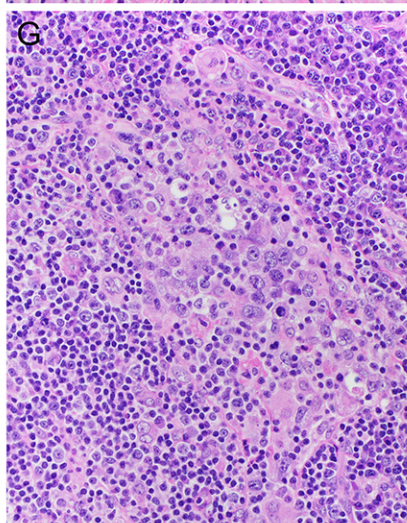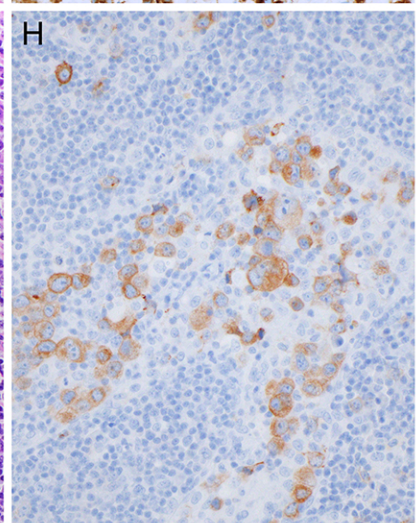

Supplement: gox-8-e3153-s001.pdf [file gox-8-e3153-s001.pdf]
